# Supplementary material
Source: HighWire-hosted journal article supplement (https://bmjopen.bmj.com/content/9/7/e029460)
Supplement: inline-supplementary-material-1 [file inline-supplementary-material-1.pdf]

## **Information leaflet for the parent/care-giver**

DEPARTMENT OF PEDIATRIC DENTISTRY, FACULTY OF DENTAL  
MEDICINE, PLOVDIV

### **Efficacy of vibrotactile device DentalVibe in reducing injection pain and anxiety during local anesthesia in pediatric dental patients**

Dear parents,

Achieving high-quality dental care in children is closely related to painless treatment and an approach that does not raise anxiety and fear.

You and your child are invited to participate in the program of the Department of Pediatric Dentistry in Plovdiv aiming to investigate the efficacy of the DentalVibe device to reduce pain and anxiety related to local anesthesia. Your child's participation is voluntary. If you declare a willingness to participate, your child will be part of a group of children included in a study to determine the ability of this new device to reduce pain and anxiety during the injection of local anesthetic. The two primary teeth indicated for extraction will be removed in two separate visits, during one of which the DentalVibe device will assist the anesthetic injection. To determine its effectiveness, we will record your child's reactions to treatment, including local anesthesia and tooth extraction. Prior to treatment, the child will be asked to fill out a questionnaire about their fear of the dental environment. The manipulations will be explained to your child in age-appropriate language and assent for participation will be sought. During the visit, the child will be asked to rate their level of pain, if any, on a scale adapted for children. The collected information will be kept strictly confidential and accessible only to the investigators who conduct the study. The results will be presented and discussed in a scientific report on the project. When publishing in scientific literature your name and data will not be announced publicly.

Thank you for your time and attention!
